# Supplementary material for: Exploring the Business Case for Textile-to-Textile Recycling Using Post-Consumer Waste in the US: Challenges and Opportunities
Source: MDPI journal article supplement (doi:10.3390/su15021473), 2023-01-12
Supplement: s1 [file s1]

Archive with 1 entries (1 files):
- sustainability-2106952-supplementary.pdf
